# Supplementary material
Source: MDPI journal article supplement (https://www.mdpi.com/2410-3888/9/5/171)
Supplement: s1 [file s1]

**Table S1.** PERANOVA (Permutational Analysis of Variance) performed for each commercial taxonomic group with trammel net and guarding net, on the factors: Gear (Ge), Location (Lo) and Period (Pe); ns = not significant, \* = significant for  $p < 0.05$ , \*\* = significant for  $p < 0.01$ .

| Variable      | Source   | df | MS       | Pseudo-F | $p(\text{perm})$ | Perms | Pair wise                                       |
|---------------|----------|----|----------|----------|------------------|-------|-------------------------------------------------|
| Osteichthyes  | Pe       | 2  | 249.55   | 0.64905  | ns               | 999   |                                                 |
|               | Lo       | 1  | 1575.8   | 4.0985   | ns               | 998   | Within level 'Porto Pino'<br>PERIOD 2>PERIOD1   |
|               | Ge       | 1  | 49.681   | 0.12921  | ns               | 999   |                                                 |
|               | PexLo    | 2  | 1519.8   | 3.9527   | *                | 999   |                                                 |
|               | PexGe    | 2  | 44.894   | 0.11676  | ns               | 998   | Within level 'PERIOD1'<br>Favignana >Porto Pino |
|               | LoxGe    | 1  | 4.7572   | 1.24E-02 | ns               | 997   |                                                 |
|               | PexLoxGe | 2  | 109      | 0.28349  | ns               | 999   |                                                 |
|               | Res      | 55 | 384.49   |          |                  |       |                                                 |
|               | Total    | 66 |          |          |                  |       |                                                 |
| Elasmobranchs | Pe       | 2  | 376.82   | 0.81037  | ns               | 999   |                                                 |
|               | Lo       | 1  | 4687.7   | 10.081   | *                | 997   | Within Location<br>Favignana> Porto Pino        |
|               | Ge       | 1  | 1617.9   | 3.4793   | ns               | 997   |                                                 |
|               | PexLo    | 2  | 398.68   | 0.85737  | ns               | 998   |                                                 |
|               | PexGe    | 2  | 40.699   | 8.75E-02 | ns               | 999   |                                                 |
|               | LoxGe    | 1  | 1417.7   | 3.0488   | ns               | 999   |                                                 |
|               | PexLoxGe | 2  | 45.022   | 9.68E-02 | ns               | 998   |                                                 |
|               | Res      | 55 | 465.01   |          |                  |       |                                                 |
|               | Total    | 66 |          |          |                  |       |                                                 |
| Molluscs      | Pe       | 2  | 1940.4   | 9.897    | **               | 997   |                                                 |
|               | Lo       | 1  | 432.32   | 2.205    | ns               | 997   |                                                 |
|               | Ge       | 1  | 263.55   | 1.3442   | ns               | 998   | Groups<br>PERIOD 1>PERIOD 2                     |
|               | PexLo    | 2  | 307.13   | 1.5665   | ns               | 999   |                                                 |
|               | PexGe    | 2  | 144.44   | 0.73672  | ns               | 997   |                                                 |
|               | LoxGe    | 1  | 117.87   | 0.60117  | ns               | 998   |                                                 |
|               | PexLoxGe | 2  | 2.0904   | 1.07E-02 | ns               | 999   |                                                 |
|               | Res      | 55 | 196.06   |          |                  |       |                                                 |
|               | Total    | 66 |          |          |                  |       |                                                 |
| Crustaceans   | Pe       | 2  | 6.6874   | 0.18268  | ns               | 999   |                                                 |
|               | Lo       | 1  | 8.57E-02 | 2.34E-03 | ns               | 996   |                                                 |
|               | Ge       | 1  | 1.5109   | 4.13E-02 | ns               | 996   |                                                 |
|               | PexLo    | 2  | 36.218   | 0.98938  | ns               | 998   |                                                 |
|               | PexGe    | 2  | 23.221   | 0.63433  | ns               | 999   |                                                 |
|               | LoxGe    | 1  | 93.196   | 2.5459   | ns               | 993   |                                                 |
|               | PexLoxGe | 2  | 5.5164   | 0.15069  | ns               | 999   |                                                 |
|               | Res      | 55 | 36.607   |          |                  |       |                                                 |
|               | Total    | 66 |          |          |                  |       |                                                 |

**Table S2.** PERANOVA (Permutational Analysis of Variance) performed for discarded taxonomic groups with trammel net and guarding net, on the factors: Gear (Ge), Location (Lo) and Period (Pe); ns = not significant, \* = significant for  $p < 0.05$ , \*\* = significant for  $p < 0.01$ .

| Variable      | Source     | df | MS      | Pseudo-F | p(perm) | Perms | Pair wise |
|---------------|------------|----|---------|----------|---------|-------|-----------|
| Osteichthyes  | Pe         | 2  | 674.61  | 2.1719   | ns      | 999   |           |
|               | Lo         | 1  | 404.3   | 1.3016   | ns      | 996   |           |
|               | Ge         | 1  | 29.631  | 9.54E-02 | ns      | 998   |           |
|               | PexLo      | 2  | 76.264  | 0.24552  | ns      | 998   |           |
|               | PexGe      | 2  | 316.05  | 1.0175   | ns      | 998   |           |
|               | LoxGe      | 1  | 193.76  | 0.6238   | ns      | 998   |           |
|               | PexLoxGe** | 1  | 868.32  | 2.7955   | ns      | 998   |           |
|               | Res        | 57 | 310.62  |          |         |       |           |
|               | Total      | 67 |         |          |         |       |           |
| Elasmobranchs | Pe         | 2  | 363.3   | 1.1532   | ns      | 999   |           |
|               | Lo         | 1  | 1019.1  | 3.2346   | ns      | 991   |           |
|               | Ge         | 1  | 0.17482 | 5.55E-04 | ns      | 994   |           |
|               | PexLo      | 2  | 615.6   | 1.954    | ns      | 999   |           |
|               | PexGe      | 2  | 123.58  | 0.39227  | ns      | 999   |           |
|               | LoxGe      | 1  | 715.21  | 2.2701   | ns      | 997   |           |
|               | PexLoxGe** | 1  | 5.1416  | 1.63E-02 | ns      | 997   |           |
|               | Res        | 57 | 315.05  |          |         |       |           |
|               | Total      | 67 |         |          |         |       |           |
| Molluscs      | Pe         | 2  | 93.343  | 1.912    | ns      | 997   |           |
|               | Lo         | 1  | 54.661  | 1.1196   | ns      | 997   |           |
|               | Ge         | 1  | 0.51709 | 1.06E-02 | ns      | 994   |           |
|               | PexLo      | 2  | 151.19  | 3.0969   | ns      | 999   |           |
|               | PexGe      | 2  | 26.473  | 0.54227  | ns      | 999   |           |
|               | LoxGe      | 1  | 47.932  | 0.98181  | ns      | 997   |           |
|               | PexLoxGe** | 1  | 23.775  | 0.48699  | ns      | 997   |           |
|               | Res        | 57 | 48.82   |          |         |       |           |
|               | Total      | 67 |         |          |         |       |           |
| Crustaceans   | Pe         | 2  | 21.773  | 0.406    | ns      | 998   |           |
|               | Lo         | 1  | 1.7126  | 3.19E-02 | ns      | 996   |           |
|               | Ge         | 1  | 27.175  | 0.50672  | ns      | 996   |           |
|               | PexLo      | 2  | 21.534  | 0.40153  | ns      | 999   |           |
|               | PexGe      | 2  | 72.237  | 1.347    | ns      | 997   |           |
|               | LoxGe      | 1  | 36.92   | 0.68844  | ns      | 999   |           |
|               | PexLoxGe** | 1  | 41.45   | 0.77291  | ns      | 995   |           |
|               | Res        | 57 | 53.629  |          |         |       |           |
|               | Total      | 67 |         |          |         |       |           |
| Echinoderms   | Pe         | 2  | 30.864  | 0.31441  | ns      | 998   |           |
|               | Lo         | 1  | 298.1   | 3.0367   | ns      | 996   |           |
|               | Ge         | 1  | 0.98023 | 9.99E-03 | ns      | 997   |           |
|               | PexLo      | 2  | 62.488  | 0.63656  | ns      | 998   |           |
|               | PexGe      | 2  | 207.16  | 2.1103   | ns      | 999   |           |
|               | LoxGe      | 1  | 25.582  | 0.2606   | ns      | 994   |           |
|               | PexLoxGe** | 1  | 138.7   | 1.413    | ns      | 994   |           |
|               | Res        | 57 | 98.165  |          |         |       |           |
|               | Total      | 67 |         |          |         |       |           |
| Seagrasses    | Pe         | 2  | 328.58  | 3.9982   | ns      | 998   |           |
|               | Lo         | 1  | 35.884  | 0.43664  | ns      | 998   |           |

|               |              |          |               |               |           |            |                         |
|---------------|--------------|----------|---------------|---------------|-----------|------------|-------------------------|
|               | Ge           | 1        | 24.984        | 0.30401       | ns        | 995        |                         |
|               | PexLo        | 2        | 53.28         | 0.64831       | ns        | 998        |                         |
|               | PexGe        | 2        | 39.253        | 0.47762       | ns        | 999        |                         |
|               | LoxGe        | 1        | 11.167        | 0.13588       | ns        | 998        |                         |
|               | PexLoxGe**   | 1        | 3.1714        | 3.86E-02      | ns        | 999        |                         |
|               | Res          | 57       | 82.183        |               |           |            |                         |
|               | Total        | 67       |               |               |           |            |                         |
| Macroalgae    | <b>Pe</b>    | <b>2</b> | <b>539.51</b> | <b>3.963</b>  | <b>*</b>  | <b>998</b> |                         |
|               | Lo           | 1        | 34.549        | 0.25379       | ns        | 996        | Within level 'GN'       |
|               | Ge           | 1        | 88.772        | 0.65208       | ns        | 995        |                         |
|               | PexLo        | 2        | 30.232        | 0.22207       | ns        | 998        | Groups                  |
|               | PexGe        | 2        | 60.441        | 0.44398       | ns        | 998        | Porto Pino > Favignana. |
|               | <b>LoxGe</b> | <b>1</b> | <b>1780.2</b> | <b>13.076</b> | <b>**</b> | <b>997</b> |                         |
|               | PexLoxGe**   | 1        | 115.73        | 0.85009       | ns        | 999        |                         |
|               | Res          | 57       | 136.14        |               |           |            |                         |
|               | Total        | 67       |               |               |           |            |                         |
| Coralligenous | Pe           | 2        | 36.364        | 1.1927        | ns        | 998        |                         |
|               | Lo           | 1        | 13.68         | 0.44871       | ns        | 996        |                         |
|               | Ge           | 1        | 24.331        | 0.79807       | ns        | 996        |                         |
|               | PexLo        | 2        | 18.57         | 0.60909       | ns        | 997        |                         |
|               | PexGe        | 2        | 67.621        | 2.218         | ns        | 998        |                         |
|               | LoxGe        | 1        | 44.595        | 1.4627        | ns        | 995        |                         |
|               | PexLoxGe**   | 1        | 44.78         | 1.4688        | ns        | 996        |                         |
|               | Res          | 57       | 30.488        |               |           |            |                         |
|               | Total        | 67       |               |               |           |            |                         |

---

**Table S3.** PERANOVA (Permutational Analysis of Variance) performed for each commercial taxonomic group caught with trapula and traditional pots, on the factors: Pots and Period (Pe); ns = not significant, \* = significant for  $p < 0.05$ , \*\* = significant for  $p < 0.01$ .

| Variable     | Source  | df | MS     | Pseudo-F | p(perm) | Perms | Pair wise |
|--------------|---------|----|--------|----------|---------|-------|-----------|
| Crustaceans  | Pots    | 1  | 44.194 | 1.6899   | ns      | 80    |           |
|              | Pe      | 1  | 44.194 | 1.6899   | ns      | 81    |           |
|              | PotsxPe | 1  | 44.194 | 1.6899   | ns      | 79    |           |
|              | Res     | 8  | 26.153 |          |         |       |           |
|              | Total   | 11 |        |          |         |       |           |
| Molluscs     | Pots    | 1  | 165.71 | 1.0832   | ns      | 362   |           |
|              | Pe      | 1  | 386.55 | 2.5268   | ns      | 373   |           |
|              | PotsxPe | 1  | 3.5515 | 2.32E-02 | ns      | 350   |           |
|              | Res     | 8  | 152.98 |          |         |       |           |
|              | Total   | 11 |        |          |         |       |           |
| Osteichthyes | Pots    | 1  | 565.58 | 0.8377   | ns      | 986   |           |
|              | Pe      | 1  | 5.7835 | 8.57E-03 | ns      | 976   |           |
|              | PotsxPe | 1  | 9.1186 | 1.35E-02 | ns      | 982   |           |
|              | Res     | 8  | 675.16 |          |         |       |           |
|              | Total   | 11 |        |          |         |       |           |

**Table S4.** PERANOVA (Permutational Analysis of Variance) performed for each discarded taxonomic group caught with trapula and traditional pots, on the factors: Pots and Period (Pe); ns = not significant, \* = significant for  $p < 0.05$ , \*\* = significant for  $p < 0.01$ .

| Variable     | Source      | df       | MS            | Pseudo-F      | p(perm)   | Perms      | Pair wise             |
|--------------|-------------|----------|---------------|---------------|-----------|------------|-----------------------|
| Crustaceans  | <b>Pots</b> | <b>1</b> | <b>130.23</b> | <b>5.9643</b> | <b>*</b>  | <b>950</b> |                       |
|              | Pe          | 1        | 5.7712        | 0.26431       | ns        | 962        | Traditional > Trapula |
|              | PotsxPe     | 1        | 0.86719       | 3.97E-02      | ns        | 943        |                       |
|              | Res         | 8        | 21.835        |               |           |            |                       |
|              | Total       | 11       |               |               |           |            |                       |
| Molluscs     | <b>Pots</b> | <b>1</b> | <b>51.829</b> | <b>16.051</b> | <b>**</b> | <b>303</b> |                       |
|              | Pe          | 1        | 6.6667        | 2.0646        | ns        | 314        | Traditional > Trapula |
|              | PotsxPe     | 1        | 5.66E-14      | 1.75E-14      | ns        | 320        |                       |
|              | Res         | 8        | 3.2291        |               |           |            |                       |
|              | Total       | 11       |               |               |           |            |                       |
| Osteichthyes | Pots        | 1        | 24.538        | 1.792         | ns        | 945        |                       |
|              | Pe          | 1        | 5.7252        | 0.41811       | ns        | 941        |                       |
|              | PotsxPe     | 1        | 13.811        | 1.0086        | ns        | 943        |                       |
|              | Res         | 8        | 13.693        |               |           |            |                       |
|              | Total       | 11       |               |               |           |            |                       |
| Echinoderms  | Pots        | 1        | 0.83333       | 0.43613       | ns        | 396        |                       |
|              | Pe          | 1        | 0.83333       | 0.43613       | ns        | 392        |                       |
|              | PotsxPe     | 1        | 0.83333       | 0.43613       | ns        | 378        |                       |
|              | Res         | 8        | 1.9107        |               |           |            |                       |
|              | Total       | 11       |               |               |           |            |                       |
